# Supplementary material for: Molecular Diagnosis of Usher Syndrome: Application of Two Different Next Generation Sequencing-Based Procedures
Source: PLoS One. 2012 Aug 29;7(8):e43799. doi: 10.1371/journal.pone.0043799 (PMC3430670; doi:10.1371/journal.pone.0043799)
Supplement: Table S1 — List of sequence variants with a presumably pathogenic effect. (XLS) [file pone.0043799.s011.xls]

## Sheet: TableS1
Table S1 List of sequence variants with a presumably pathogenic effect.
USH Sample (Type)	Amino Acid change	Protein Domain	PolyPhen-2 v2.1	USMA
MYO7A				Ortholog conservation	Domain conservation	Secondary structure analysis	3D analysis
A18 (1)	p.S1471P	FERM 1	Probably Damaging	0.9583	0.1543	Less observed	Alter the hydrogen bond network.
A19 (1)	p.T1566M	FERM 1	Benign	0.25	0.0062	Loop	No 3D model available
Long-PCR3 (1)	p.A26E	Motor domain	Unknown	1	Non defined domain	Residues are found equivalent	No 3D model available
Long-PCR3 (1)	p.S1276*	FERM 1	Unknown	1	0.1852	Loop	Truncate Protein
PCDH15
USH126 (2)	p.V1627A	Non defined domain	Unknown	N.A	N.A	N.A	No 3D model available
USH2A
USH100 (2)	p.G4692R	Fibronectin type-III 32	Probably Damaging	0.6471	0.2102	Loop	Alter the hydrogen bond network.
USH100 (2)	p.V3068fs	Fibronectin type-III 17	Unknown	0.3529	0.0211	Loop	Truncate Protein
USH10_483 (2)	p.P1059L	Fibronectin type-III 1	Probably Damaging	0.7647	0.0629	Loop	Truncate Protein
A20 (2)	p.G1555C	Laminin G-like 1	Probably Damaging	0.8235	0.7685	More observed	No 3D model available
A20 (2)	p.A4740D	Fibronectin type-III 33	Probably Damaging	0.7647	0.1267	Loop	No 3D model available
Long-PCR2 (2)	p.E767fs	Laminin EGF-like 5	Unknown	0.4706	0.0736	β strand	Truncate Protein
Long-PCR1 (2)	p.G713R	Laminin EGF-like 4		1	0.8937	Loop	No 3D model available
GPR98
USH10_483 (2)	p.D3992N	Calx-beta 26	Probably Damaging	1	0.8736	Loop	Alter the hydrogen bond network.
A19 (1)	p.M3526T	EAR 6.	Benign	0.25	Non defined domain	Loop	No 3D model available
CLRN1
USH103 (2)	p.R207*	Non defined domain	Benign	0.9667	Non defined domain	Less observed	Truncate Protein
A18 (1)	p.Q73R	Non defined domain	Probably Damaging	0.9667	Non defined domain	Residues are found equivalent	No 3D model available
CDH23
Long-PCR2 (2)	p.V475M	Cadherin 5	Probably Damaging	0.7222	0.1432	Less observed	Alter the hydrogen bond network.
Long-PCR2 (2)	p.T1209A	Non defined domain	Possibly-Damaging	0.9444	Non defined domain	Loop	No 3D model available
