# Supplementary material for: Molecular Diagnosis of Usher Syndrome: Application of Two Different Next Generation Sequencing-Based Procedures
Source: PLoS One. 2012 Aug 29;7(8):e43799. doi: 10.1371/journal.pone.0043799 (PMC3430670; doi:10.1371/journal.pone.0043799)
Supplement: Table S3 — Coverage and Strand bias test for USH patients Variants. (XLS) [file pone.0043799.s013.xls]

## Sheet: TableS3
Table 3S Coverage and Strand bias test for USH patients Variants.
USH Sample (Type)	Gene	Transcript	Zygosity	DP1	DP42	PV43	Non-ref alleles Ratio
A18 (1)	MYO7A	NM_000260:c.T4411C:p.S1471P	Hetero	49	11,11,7,14	0.36	0.333333
	CLRN1	NM_174878:c.A218G:p.Q73R	Hetero	34	13,7,10,3	0.7	0.230769
A19 (1)	MYO7A	NM_000260:c.C4697T:p.T1566M	Hetero	21	9,0,9,1	1	0.1
	GPR98	NM_032119:c.T10577C:p.M3526T	Hetero	33	8,6,15,1	0.031*	0.0625
A20 (2)	USH2A	NM_206933:c.G4663T:p.G1555C	Hetero	15	6,3,4,1	1	0.2
	USH2A	NM_206933:c.C14219A:p.A4740D	Hetero	13	1,6,1,4	1	0.2
USH100 (2)	USH2A	NM_206933:c.G14074A:p.G4692R	Hetero	24	5,5,4,5	1	0.444444
	USH2A	NM_206933:c.9203delT:p.V3068fs	Hetero	39	10,0,4,6	1	0.666667
USH103 (2)	CLRN1	NM_174878:c.C619T:p.R207X	Homo	31	0,0,11,17	1	0.392857
USH126 (2)	PCDH15	NM_001142771:c.T4880C:p.V1627A	Homo	23	3,9,2,8	1	0.2
USH10_483 (2)	USH2A	NM_206933:c.C3176T:p.P1059L	Hetero	29	4,8,1,16	0.13	0.0588235
	GPR98	NM_032119:c.G11974A:p.D3992N	Hetero	8	5,0,2,1	0.37	0.333333
Sample1 (2)	CDH23	NM_022124:c.1423G>C:p.V475M	Hetero	5634	20659321564744	0.39	0.431193
	USH2A	NM_206933:c.2137G>C:p.G713R	Hetero	125	9,48,11,52	1	0.174603
Sample2 (2)	USH2A	NM_206933:c.2229delG:p.E767fs	Hetero	1909	46,920,27,772	0.15	0.0337922
	CDH23	NM_022124:c.3625A>G:p.T1209A	Hetero	959	207274111257	0.00015	0.30163
Sample3 (1)	MYO7A	NM_000260:c.77C>A:p.A26E	Hetero	637	111,218,60,164	0.092	0.267857
	MYO7A	NM_000260:c.3827C>A:p.S1276*	Hetero	670	241,121,144,97	0.1	0.40249
1The number of reads covering or bridging genomic position.
2Number of 1) forward ref alleles; 2) reverse ref; 3) forward non-ref; 4) reverse non-ref alleles, used in variant calling.Sum can be smaller than DP because low-quality bases are not counted.
3P-values for variants strand bias (exact test);
